# Supplementary material
Source: publisher figshare collection journal article supplement (https://tandf.figshare.com/ndownloader/files/18164753)
Supplement: Supplementary file 1 [file 18164753]

## Sheet: Fish species and References
No.	Target fish species (scientific name)	Fluorochrome labeling dyes	Application method	Reference	Time list
1	Acanthopagrus butcheri	ALC	Direct immersion	Factors affecting mark quality of alizarin complexone-stained otoliths in juvenile black bream Acanthopagrus butcheri and a prescription for dosage	2009
2	Acanthopagrus schlegeli	TC	Direct immersion	The Determination of Mass Marking Methods with High Marks Retention Rate for Hatchery-reared Fry	2008
3	Acanthurus chirurgus	TC	Direct immersion	Environmental influences on larval duration, growth and magnitude of settlement of a coral reef fish	2005
4	Acipenser baerii	ARS; TCH	Direct immersion	Detection of chemical marks for stocking purposes in sturgeon species	2011
5	Acipenser sturio	ARS; TCH	Direct immersion	Detection of chemical marks for stocking purposes in sturgeon species	2011
6	Akihito vanuatu	ALC	Direct immersion	Pelagic larval duration of three amphidromous Sicydiinae gobies (Teleostei: Gobioidei) including widespread and endemic species	2012
7	Alosa pseudoharengus	OTC	Direct immersion	Oxytetracycline and thermal marking of alewife (Alosa pseudoharengus) otoliths	2016
8	Alosa sapidissima	TC	Direct immersion; Feeding	Multiple marking of American shad otoliths with tetracycline antibiotics	1991
9	Amblygobius bynoensis	CAL; TC; strontium chloride	Injection; Direct immersion	Validation of otolith growth-increment periodicity in tropical gobies	2000
10	Amblygobius phalaena	CAL; TC; strontium chloride	Injection; Direct immersion	Validation of otolith growth-increment periodicity in tropical gobies	2000
11	Anguilla anguilla	ALC; ARS; TC; barium; strontium	Direct immersion (for ALC; ARS; TC; barium; strontium); Injection (for TC)	Measurements on ground or sectioned otoliths: possibilities of bias; Sources of variation in growth of the European eel (Anguilla anguilla) estimated from otoliths; Traceability of stocked eels – the Swedish approach; Mass marking of stocked European glass eels (Anguilla anguilla) with alizarin red S	1992; 1994; 2014; 2015
12	Anguilla celebesensis	ALC	Direct immersion	Validation of otolith daily increments in the tropical eel Anguilla celebesensis	2000
13	Anguilla japonica	ALC; TC	Direct immersion	Factors influencing otolith increment formation in Japanese eel, Anguilla japonica T. and S., elvers; Time lag of the response on the otolith strontium/calcium ratios of the Japanese eel, Anguilla japonica to changes in strontium/calcium ratios of ambient water	1991; 2011
14	Anguilla marmorata	ALC	Direct immersion	Validation of otolith daily increments in the tropical eel Anguilla marmorata	2001
15	Anguilla rostrata	TCH	Direct immersion	Validation of daily growth increments in otoliths of Anguilla rostrata (Lesueur) elvers	1995
16	Anguilla anguilla	CAL	Injection	Validation by calcein injection of ageing European eel, Anguilla anguilla , in the Vilaine River (Brittany): First results.	1992
17	Arctoscopus japonicus	TC	Direct immersion	Otolith Daily Increment in Sandfish	1990
18	Argyrosomus japonicus	CAL	Direct immersion	Development of a Calcein Marking Technique for Juvenile Mulloway Argyrosomus japonicus to Be Used in Stock Enhancement Programs	2017
19	Argyrosomus regius	ARS	Direct immersion	Many Vulnerable or a Few Resilient Specimens? Finding the Optimal for Reintroduction/Restocking Programs: e0138501	2015
20	Aristichthys nobilis	ARS; CAL	Direct immersion	Experimental evaluation of using calcein and alizarin red S for immersion marking of bighead carp Aristichthys nobilis (Richardson, 1845) to assess growth and identification of marks in otoliths, scales and fin rays	2015
21	Arripis trutta	TC	Injection	Influence of latitudinal variation in environmental gradients and population structure on the demography of a widespread pelagic fish	2017
22	Asterropteryx semipunctatus	CAL; TC; strontium chloride	Injection; Direct immersion	Validation of otolith growth-increment periodicity in tropical gobies	2000
23	Astyanax mexicanus	ARS	Direct immersion	Complex Evolutionary and Genetic Patterns Characterize the Loss of Scleral Ossification in the Blind Cavefish Astyanax mexicanus: e0142208	2015
24	Atherinops affinis	ARS	Direct immersion	Validation of otolith growth rate analysis using cadmium‐exposed larval topsmelt (Atherinops affinis)	2005
25	Bairdiella chrysoura	CAL	Direct immersion	Validation of daily increment formation in the otoliths of juvenile silver perch, Bairdiella chrysoura	1991
26	Bathyraja albomaculata	OTC	Injection	A novel method for the estimation of age and growth in rajids using caudal thorns	1999
27	Bathyraja brachyurops	OTC	Injection	A novel method for the estimation of age and growth in rajids using caudal thorns	1999
28	Bathyraja griseocauda	OTC	Injection	A novel method for the estimation of age and growth in rajids using caudal thorns	1999
29	Bathyraja scaphiops	OTC	Injection	A novel method for the estimation of age and growth in rajids using caudal thorns	1999
30	Bellapiscis lesleyae	TC	Direct immersion; Injection	Pelagic larval duration and population connectivity in New Zealand triplefin fishes (Tripterygiidae)	2011
31	Campostoma anomalum	ALC; ARS	Direct immersion	A simple method for marking fish otoliths with alizarin compounds	1991
32	Carapus boraborensis	ARS	Direct immersion	Identification of tenuis of four French Polynesian Carapini (Carapidae: Teleostei)	2002
33	Carapus homei	ARS	Direct immersion	Identification of tenuis of four French Polynesian Carapini (Carapidae: Teleostei)	2002
34	Carapus mourlani	ARS	Direct immersion	Identification of tenuis of four French Polynesian Carapini (Carapidae: Teleostei)	2002
35	Carassius auratus	ALC	Direct immersion	Multiple marking of alizarin complexone for the otolith of nigorobuna Carassius auratus grandoculis and estimation of individual size-at-release	2010
36	Catostomus commersoni	ALC; ARS	Direct immersion	A simple method for marking fish otoliths with alizarin compounds	1991
37	Centroselachus crepidater	ARS	Direct immersion	Surface bands on deepwater squalid dorsal-fin spines: an alternative method for ageing Centroselachus crepidater	2006
38	Cheilodactylus fuscus	TC	Injection	Home range, activity and distribution patterns of a temperate rocky-reef fish, Cheilodactylus fuscus	1998
39	Chlorurus sordidus	TC	Injection	Growth and longevity in fishes of the family Scaridae	1996
40	Chrysoblephus laticeps	ALC; OTC	Direct immersion; Feeding; Injection	Validation of age estimates in sparid fish using fluorochrome marking	1993
41	Clupea harengus	ALC	Direct immersion	Otolith micro-increment formation in herring Clupea harengus larvae in relation to growth rate	2003
42	Clupea pallasii	ALC	Direct immersion	Differences in body proportions between hatchery-reared-and wild Pacific herring, Clupea pallasii (Actinopterygii: Clupeiformes: Clupeidae)	2013
43	Colorado squawfish	TC	Direct immersion	Effect of sunlight on tetracycline marks in otoliths of Colorado squawfish larvae	1991
44	Conger conger	TCH	Direct immersion	An evaluation of the otolith characteristics of Conger conger during metamorphosis	2006
45	Coregonus albula	ARS	Direct immersion	Marking and return method for evaluating the effects of stocking larval vendace, Coregonus albula (L.), into Lake Wigry in 2000-2001	2011
46	Coregonus lavaretus	ARS; TC	Direct immersion (for ARS; TC); Feeding (for TC); Osmotic induction (for ARS)	Tetracycline Marking of Coregonids at the Time of Egg Fertilization; Persistence of tetracycline mark in the otoliths of whitefish (Coregonus lavaretus ); Alizarin marking of whitefish, Coregonus lavaretus otoliths during egg incubation	1992; 1992; 2003
47	Coregonus peled	TC	Direct immersion	Tetracycline tagging in coregonid embryos and larvae	1986
48	Ctenopharyngodon idella	ARS	Direct immersion	First records of scale deformities in seven freshwater fish species (Actinopterygii: Percidae and Cyprinidae) collected from three ponds in the Czech Republic	2016
49	Ctenopharyngodon idellus	ARS; CAL	Direct immersion	Experimental evaluation of calcein and alizarin red S for immersion marking grass carp Ctenopharyngodon idellus	2015
50	Cyclopterus lumpus	ARS	Direct immersion	The morphology and sculpture of ossicles in the Cyclopteridae and Liparidae (Teleostei) of the Baltic Sea	2010
51	Cyprinodon variegatus	ARS	Direct immersion	Scale formation in selected fundulid and cyprinodontid fishes	2009
52	Cyprinus carpio	ARS; CAL; TCH	Injection	Vital staining of the hard tissues of carp, Cyprinus carpio Linne, with tetracycline-HCl, calcein and alizarin red S	1971
53	Danio rerio	ARS; CAL; OTC	Direct immersion	The zebrafish scale as model to study the bone mineralization process; The Effect of Water Hardness on Mortality of Zebrafish (Danio rerio) During Exposure to Oxytetracycline	2012; 2016
54	Dibrachichthys melanurus	ARS	Direct immersion	A New Genus and Species of the Shallow-Water Anglerfish Family Tetrabrachiidae (Teleostei: Lophiiformes: Antennarioidei) from Australia and Indonesia	2009
55	Diplodus cervinus	ALC; OTC	Direct immersion; Feeding; Injection	Validation of age estimates in sparid fish using fluorochrome marking	1993
56	Diplodus puntazzo	ALC; TCH	Direct immersion	Validation of daily increment formation in otoliths for three Diplodus species in the Mediterranean sea	1997
57	Diplodus sargus	ALC; OTC; TCH	Direct immersion (for ALC; OTC; TCH); Feeding (for ALC; OTC); Injection (for ALC; OTC)	Validation of age estimates in sparid fish using fluorochrome marking; Validation of daily increment formation in otoliths for three Diplodus species in the Mediterranean sea	1993; 1997
58	Diplodus vulgaris	ALC; TCH	Direct immersion	Validation of daily increment formation in otoliths for three Diplodus species in the Mediterranean sea	1997
59	Eleginops maclovinus	TC	Injection	age and growth in a temperate euryhaline notothenioid, eleginops maclovinus from the falkland islands	2005
60	Enchelio phisgracilis	ARS	Direct immersion	Identification of tenuis of four French Polynesian Carapini (Carapidae: Teleostei)	2002
61	Engraulis japonicus	ALC	Direct immersion	Validation of daily increment formation in otoliths of immature and adult Japanese anchovy Engraulis japonicus	2010
62	Engraulis ringens	ARS; OTC	Direct immersion	Validation of daily microincrement deposition in otoliths of juvenile and adult Peruvian anchovy Engraulis ringens	2015
63	Epinephelus microdon	OTC	Injection	Study of the frequency of increment formation on the otoliths of a tropical Serranidae, Epinephelus microdon (Bleeker), using a fluorescent marker: Oxytetracycline	1989
64	Esox lucius	ALC; TC; strontium	Direct immersion (for ALC; strontium); Injection (for TC)	Growth and Relative Size of Calcified Structures of Fish; Marking pike fry otoliths with alizarin complexone and strontium: an evaluation of methods	1990; 2001
65	Esox masquinongy	TC	Injection	Growth and Relative Size of Calcified Structures of Fish	1990
66	Eucyclogobius newberryi	CAL	Direct immersion	Preying on invasives: the exotic New Zealand mudsnail in the diet of the endangered tidewater goby	2011
67	Favonigobius reichei	CAL; TC; strontium chloride	Injection; Direct immersion	Validation of otolith growth-increment periodicity in tropical gobies	2000
68	Forsterygion malcolmi	TC	Direct immersion; Injection	Pelagic larval duration and population connectivity in New Zealand triplefin fishes (Tripterygiidae)	2011
69	Fundulus confluentus	ARS	Direct immersion	Scale formation in selected fundulid and cyprinodontid fishes	2010
70	Fundulus grandis	OTC	Direct immersion	Age and growth of a subtropical marsh fish: The Gulf Killifish, Fundulus grandis	2001
71	Fundulus heteroclitus	ARS	Direct immersion	Scale formation in selected fundulid and cyprinodontid fishes	2011
72	Fundulus luciae	ARS	Direct immersion	Scale formation in selected fundulid and cyprinodontid fishes	2012
73	Fundulus majalis	ARS	Direct immersion	Scale formation in selected fundulid and cyprinodontid fishes	2013
74	Gadus morhua	ALC; OTC; TC	Direct immersion (for ALC); Feeding (for OTC); Injection (for TC)	Marking cod (Gadus morhua L.) juveniles with oxytetracycline incorporated into the feed; Sublethal effects of alizarin complexone marking on Baltic cod (Gadus morhua) eggs and larvae; Tetracycline marks visible in Baltic cod Gadus morhua otoliths stored for 40 years	1991; 2012; 2016
75	Gasterosteus aculeatus	ARS	Direct immersion	Widespread Parallel Evolution in Sticklebacks by Repeated Fixation of Ectodysplasin Alleles	2005
76	Genypterus blacodes	ALC	Direct immersion	Comparison of daily increment formation pattern between sagittae and lapilli of ling (Genypterus blacodes) larvae and juveniles collected off Argentina	2001
77	Ginglvmostotna cirratum	CAL	Injection	Use of Calcein as a Fluorescent Marker for Elasmobranch Vertebral Cartilage	1997
78	Glossogobius biocellatus	CAL; TC; strontium chloride	Injection; Direct immersion	Validation of otolith growth-increment periodicity in tropical gobies	2000
79	Gnathodentex aurolineatus	ARS	Direct immersion	Larval life history traits and larval growth of Gnathodentex aurolineatus (Lethrinidae) before and after settlement in a sandy bay of Reunion Island (SW Indian Ocean)	2006
80	Gobiocypris rarus	ALC; TC	Direct immersion	Using fluorescent substance to mark larvae and juvenile of Gobiocypris rarus and Carassius auratus pengze var	1999
81	Gobiodon histrio	CAL; TC; strontium chloride	Injection; Direct immersion	Validation of otolith growth-increment periodicity in tropical gobies	2000
82	Gymnocephalus cernua	ARS	Direct immersion	First records of scale deformities in seven freshwater fish species (Actinopterygii: Percidae and Cyprinidae) collected from three ponds in the Czech Republic	2016
83	Halichoeres miniatus	TC	Direct immersion	Growth acceleration, behaviour and otolith check marks associated with sex change in the wrasse Halichoeres miniatus	2009
84	Heterandria formosa	CAL	Direct immersion	The Suitability of Calcein to Mark Poeciliid Fish and a New Method of Detection	2001
85	Himanutra uarnak	CAL	Injection	Growth of Tropical dasyatid Rays Estimated Using a Multi-Analytical Approach: e77194	2013
86	Hirundichthys affinis	TC	Injection	Otolith age validation and growth-rate variation in flyingfish (Hirundichthys affinis) from the eastern Caribbean	1994
87	Hucho hucho	ARS	Direct immersion	Genetic evaluation of the self-sustaining status of a population of the endangered Danube salmon, Hucho hucho	2016
88	Hybognathus placitus	ALC	Direct immersion	Validation of Daily Growth Increment Formation in the Otoliths of Juvenile Cyprinid Fishes from the Brazos River, Texas	2008
89	Hypomesus transpacificus	CAL	Osmotic induction	Evaluation of Calcein and Photonic Marking for Cultured Delta Smelt	2014
90	Hypophthalmichthys molitrix	ARS; CAL	Direct immersion	Experimental evaluation of calcein and alizarin red S for immersion marking of silver carp Hypophthalmichthys molitrix (Valenciennes, 1844)	2016
91	Hypophthalmichthys nobilis	ARS	Direct immersion	First records of scale deformities in seven freshwater fish species (Actinopterygii: Percidae and Cyprinidae) collected from three ponds in the Czech Republic	2016
92	Hyporhamphus sajori	ALC	Direct immersion	Validation of otolith daily increments for larval and juvenile Japanese halfbeak Hyporhamphus sajori	2008
93	Ictalurus punctatus	CAL; OTC	Direct immersion	Evaluation of a cohabitation challenge model in immunization trials for channel catfish Ictalurus punctatus against Ichthyophthirius multifiliis; Factors related to stocking success of 178-mm channel catfish in medium size Oklahoma reservoirs	2006; 2013
94	Istigobius goldmanni	CAL; TC; strontium chloride	Injection; Direct immersion	Validation of otolith growth-increment periodicity in tropical gobies	2000
95	Istiophorus platypterus	OTC	Injection	A technique for tetracycline injecting and tagging billfish	1992
96	Isurus oxyrinchus	ARS	Direct immersion	Age and growth analysis of the shortfin mako, Isurus oxyrinchus, in the western and central North Pacific Ocean	2004
97	Katsuwonus pelami	TC	Injection	Irregular microincrement deposition on the otoliths of skipjack tuna (Katsuwonus pelamis) from the Maldives	1996
98	Labidesthes sicculus	ALC	Direct immersion	Growth, summer cohort output, and observations on the reproduction of brook silverside, Labidesthes sicculus (Cope) in the Kawartha Lakes, Ontario	2008
99	Lates calcarifer	TC	Direct immersion	Comparisons of Survival Rates, Mark Retention Rates and Mark Retention Times of Giant Seaperch (Lates calcarifer) between Three Mass-marking Methods	2005
100	Lates japonicus	TC	Direct immersion	The Determination of Mass Marking Methods with High Marks Retention Rate for Hatchery-reared Fry	2008
101	Leiostomus xanthurus	CAL; TC	Direct immersion	Calcein as a Fluorescent Marker of Otoliths of Larval and Juvenile Fish; Validation of daily increment deposition in the otoliths of spot (Leiostomus xanthurus )	1987; 1989
102	Lepisosteus oculatus	ARS	Direct immersion	Evolution of the osteoblast: skeletogenesis in gar and zebrafish	2012
103	Lepomis cyanellus	OTC	Injection	Validation of three black-calculation models by using multiple oxytetracycline marks formed in the otoliths and scales of bluegill x green sunfish hybrids	2001
104	Lepomis macrochirus	OTC	Injection	Validation of three black-calculation models by using multiple oxytetracycline marks formed in the otoliths and scales of bluegill x green sunfish hybrids	2001
105	Leptobotia elongata	ALC; ARS	Direct immersion	Otolith fluorescent and thermal marking of elongate loach (Leptobotia elongata) at early life stages	2016
106	Leuciscus idus	ARS; CAL; TCH	Direct immersion (for ARS); Feeding (for ARS; CAL; TCH)	Mass marking of Leuciscus idus larvae using Artemia salina as a vector of fluorescent dyes; First records of scale deformities in seven freshwater fish species (Actinopterygii: Percidae and Cyprinidae) collected from three ponds in the Czech Republic	2015; 2016
107	Liparis liparis	ARS	Direct immersion	The morphology and sculpture of ossicles in the Cyclopteridae and Liparidae (Teleostei) of the Baltic Sea	2010
108	Lucania parva	ARS	Direct immersion	Scale formation in selected fundulid and cyprinodontid fishes	2014
109	Lutjanus argentimaculatus	OTC	Injection	A new approach to validation of periodicity and timing of opaque zone formation in the otoliths of eleven species of Lutjanus from the central Great Barrier Reef	2000
110	Lutjanus bohar	OTC	Injection	A new approach to validation of periodicity and timing of opaque zone formation in the otoliths of eleven species of Lutjanus from the central Great Barrier Reef	2000
111	Lutjanus campechanus	ALC	Direct immersion	Validation of first annulus formation in red snapper otoliths with the use of an alizarin complexone fluorescent marker	2010
112	Lutjanus carponotatus	OTC; TC	Injection	Contrasting patterns of reef utilization and recruitment of coral trout (Plectropomus leopardus) and snapper (Lutjanus carponotatus) at One Tree Island, southern Great Barrier Reef; A new approach to validation of periodicity and timing of opaque zone formation in the otoliths of eleven species of Lutjanus from the central Great Barrier Reef	2000; 2009
113	Lutjanus erythropterus	OTC	Injection	A new approach to validation of periodicity and timing of opaque zone formation in the otoliths of eleven species of Lutjanus from the central Great Barrier Reef	2000
114	Lutjanus johnii	OTC; TC	Injection	Comparative precision and bias of five different ageing methods for the large tropical snapper Lutjanus johnii; A new approach to validation of periodicity and timing of opaque zone formation in the otoliths of eleven species of Lutjanus from the central Great Barrier Reef	2000; 2000
115	Lutjanus malabaricus	OTC	Injection	A new approach to validation of periodicity and timing of opaque zone formation in the otoliths of eleven species of Lutjanus from the central Great Barrier Reef	2000
116	Lutjanus monostigma	OTC	Injection	A new approach to validation of periodicity and timing of opaque zone formation in the otoliths of eleven species of Lutjanus from the central Great Barrier Reef	2000
117	Lutjanus rivulatus	OTC	Injection	A new approach to validation of periodicity and timing of opaque zone formation in the otoliths of eleven species of Lutjanus from the central Great Barrier Reef	2000
118	Lutjanus sebae	OTC	Injection	A new approach to validation of periodicity and timing of opaque zone formation in the otoliths of eleven species of Lutjanus from the central Great Barrier Reef	2000
119	Lutjanus vitta	OTC	Injection	A new approach to validation of periodicity and timing of opaque zone formation in the otoliths of eleven species of Lutjanus from the central Great Barrier Reef	2000
120	Maccullochella peelii	CAL	Osmotic induction	Assessment of stocking effectiveness for Murray cod (Maccullochella peelii) and golden perch (Macquaria ambigua) in rivers and impoundments of south-eastern Australia	2016
121	Macquaria ambigua	ARS; CAL	Osmotic induction	Development and Evaluation of Methods for Osmotic Induction Marking of Golden Perch Macquaria ambigua with Calcein and Alizarin Red S	2009
122	Macquaria novemaculeata	CAL	Osmotic induction	Optimising chemical marking techniques for Australian bass, Macquaria novemaculeata, fry and fingerlings prior to restocking	2012
123	Makaira indica	TC	Injection	Age and growth of black marlin, Makaira indica, in east coast Australian waters	2003
124	Makaira mazara	OTC	Injection	A technique for tetracycline injecting and tagging billfish	1992
125	Micrometrus minimus	TC	Injection	Daily otolith increments and the early life history of a viviparous fish, Micrometrus minimus (Embiotocidae)	1990
126	Micropogonias undulatu	CAL	Direct immersion	Calcein as a Fluorescent Marker of Otoliths of Larval and Juvenile Fish	1987
127	Micropterus salmoides	ALC; CAL; OTC	Direct immersion (for ALC; OTC); Osmotic induction (for CAL)	An evaluation of population dynamics and contribution of stocked largemouth bass in pools of the Arkansas River; Alizarin complexone staining of the otolith and scale of largemouth bass, Micropterus salmoides; Survival of vaccinated, feed-trained largemouth bass fry (Micropterus salmoides floridanus) during natural exposure toFlavobacterium columnare	2005; 2009; 2009
128	Morone saxatilis	ALC; CAL; OTC	Direct immersion	A mark-release experiment on larval striped bass Morone saxatilis in a Chesapeake Bay tributary; Toxicity of Oxytetracycline and Calcein to Juvenile Striped Bass	1995; 1996
129	Mozambique Tilapia	ALC	Direct immersion	Use of Alizarin Complexone Immersion for Marking Otoliths of Mozambique Tilapia	1998
130	Myrophis punctatus	ALC	Direct immersion	Does eel metamorphosis cause a breakdown in the tenets of otolith applications? A case study using the speckled worm eel (Myrophis punctatus, Ophichthidae)	2006
131	Nelusetta ayraudi	OTC	Injection	Using otoliths to estimate age and growth of a large Australian endemic monocanthid, Nelusetta ayraudi (Quoy and Gaimard, 1824)	2010
132	Neotrygon kuhlii	CAL	Injection	Community Composition of Elasmobranch Fishes Utilizing Intertidal Sand Flats in Moreton Bay, Queensland, Australia1	2011
133	Notropis bifrenatus	CAL	Osmotic induction	Restoration of the Pennsylvania-endangered bridle shiner Notropis bifrenatus (Cope) and ironcolor shiner Notropis chalybaeus (Cope) in Brodhead Creek watershed, Monroe County	2005
134	Notropis buccula	ALC	Direct immersion	Effects of Streamflow and Intermittency on the Reproductive Success of Two Broadcast-spawning Cyprinid Fishes	2009
135	Notropis chalybaeus	CAL	Osmotic induction	Restoration of the Pennsylvania-endangered bridle shiner Notropis bifrenatus (Cope) and ironcolor shiner Notropis chalybaeus (Cope) in Brodhead Creek watershed, Monroe County	2005
136	Notropis oxyrhynchus	ALC	Direct immersion	Effects of Streamflow and Intermittency on the Reproductive Success of Two Broadcast-spawning Cyprinid Fishes	2009
137	Odontesthes bonariensis	ARS	Direct immersion; Osmotic induction	Osmotic induction marking with Alizarin Red S on juveniles of pejerrey, Odontesthes bonariensis (Atherinopsidae)	2013
138	Oncorhynchus clarkii	CAL	Direct immersion；Feeding	Evaluation of Calcein Immersion and Medicated Feed to Mark Snake River Cutthroat trout Oncorhynchus clarki and Shovelnose Sturgeon Scaphirynchus platorynchus	2005
139	Oncorhynchus keta	ALC; ARS; OTC	Direct immersion (for ALC; ARS); Feeding (for OTC)	The relationship between migration speed and release date for chum salmon Oncorhynchus keta fry exiting a 110-km northern Japanese river; Otolith tagging and related discussions with alizarin red S in chum salmon {Oncorhynchus keta) at stage of embryos; Marking Chum Salmon Fry Vertebrae with Oxytetracycline	1986; 2013; 2014
140	Oncorhynchus kisutch	ALC; CAL	Direct immersion (for ALC); Feeding (for CAL)	Relationship of otolith strontium-to-calcium ratios and salinity: experimental validation for juvenile salmonids; Dietary Calcein Marking of Brook Trout, Atlantic Salmon, Yellow Perch, and Coho Salmon Scales	2005; 2006
141	Oncorhynchus mykiss	ALC; ARS; CAL; TC	Direct immersion (for ALC; CAL; ARS); Osmotic induction (for CAL; TC)	New method for the marking of trout (Salmo trutta fario and Oncorhynchus mykiss ) eggs by osmotic incorporation of tetracycline at fertilization; Relationship of otolith strontium-to-calcium ratios and salinity: experimental validation for juvenile salmonids; Evaluation of Calcein as a Mass Mark for Rainbow Trout Raised in Outdoor Hatchery Raceways; Experimental determination of the sources of ot…	1989; 2002; 2005; 2006; 2010
142	Oncorhynchus nerka	ALC; TC	Direct immersion (for ALC; TC); Feeding (for TC)	Effect of finclipping on survival of sockeye salmon (Oncorhynchus nerka); Relationship of otolith strontium-to-calcium ratios and salinity: experimental validation for juvenile salmonids	1969; 2005
143	Oncorhynchus tshawytscha	ALC; CAL	Direct immersion (for ALC); Osmotic induction (for CAL)	Relationship of otolith strontium-to-calcium ratios and salinity: experimental validation for juvenile salmonids; Calcein Mark Retention in Chinook Salmon and Steelhead Fry in Artificial and Natural Rearing Environments	2005; 2010
144	Oreochromis niloticus	ARS; CAL; TC	Direct immersion (for ARS; CAL); Injection (for CAL; TC); Osmotic induction (for ARS)	Effects of confinement stress of variable duration on the growth and microincrement deposition in the otoliths of Oreochromis niloticus (Cichlidae); A vaccination and challenge model using calcein marked fish; Evaluation of marking efficiency of different alizarin red S concentrations on body fish structures in Oreochromis niloticus (Perciformes: Cichlidae) juveniles; Protection against heterolog…	2004; 2006; 2010; 2013
145	Ostorhinchus doederleini	TC	Feeding	Planktonic Larval Duration, age and growth of Ostorhinchus doederleini (Pisces: Apogonidae) on the southern Great Barrier Reef, Australia	2014
146	Paralichthys dentatus	CAL; TC	Injection	NOTES: Comparison of Calcein and Tetracycline as Chemical Markers in Summer Flounder	1993
147	Paralichthys olivaceus	ALC; ARS	Direct immersion	The use of alizarin red S and alizarin complexone for immersion marking Japanese flounder Paralichthys olivaceus (T.)	2009
148	Pastinachus atrus	CAL	Injection	Growth of Tropical dasyatid Rays Estimated Using a Multi-Analytical Approach: e77196	2013
149	Perca flavescens	ALC; CAL	Direct immersion (for ALC); Feeding (for CAL); Osmotic induction (for CAL)	Dietary Calcein Marking of Brook Trout, Atlantic Salmon, Yellow Perch, and Coho Salmon Scales; Elucidating patterns of size-dependent predation on larval yellow perch (Perca flavescens) in Lake Michigan: an experimental and modeling approach; Yellow perch production in semi-permanent wetlands in eastern South Dakota and evaluation of a new chemical marking tool for juvenile yellow perch	2006; 2006; 2006
150	Perca fluviatilis	ARS	Direct immersion	First records of scale deformities in seven freshwater fish species (Actinopterygii: Percidae and Cyprinidae) collected from three ponds in the Czech Republic	2016
151	Phoxinus erythrogaster	ALC; ARS	Direct immersion	A simple method for marking fish otoliths with alizarin compounds	1991
152	Plecoglossus altivelis	ALC; CAL; TC; TCH	Direct immersion (for ALC; CAL; TC; TCH); Injection (for TC)	Mass-Marking of Ayu Eggs and Larvae by Tetracycline-Tagging of Otoliths; Otolith tagging of ayu embryo with fluorescent substances; Age Determination of Ayu with Otolith	1985; 1987; 1998
153	Plectropomus leopardus	TC	Injection	Age validation and estimation of growth rate of the coral trout, Plectropomus leopardus, (Lacepede 1802) from Lizard Island, northern Great Barrier Reef; Contrasting patterns of reef utilization and recruitment of coral trout (Plectropomus leopardus) and snapper (Lutjanus carponotatus) at One Tree Island, southern Great Barrier Reef	1994; 2009
154	Poecilia reticulata	ARS; CAL	Direct immersion	A Comparison of the Suitability of Alizarin Red S and Calcein for Inducing a Nonlethally Detectable Mark in Juvenile Guppies	2004
155	Pomacanthus paru	TC	Direct immersion	Estimates on age, growth and mortality of the French angelfish Pomacanthus paru (Bloch, 1787) (Teleostei: Pomacanthidae) in the southwestern Atlantic	2017
156	Pomacentrus amboinensis	TC	Direct immersion	Self-recruitment in a coral reef fish population	1999
157	Pomacentrus coelestis	TC	Direct immersion	Growth and pelagic larval duration of presettlement and newly settled neon damselfish, Pomacentrus coelestis, at multiple spatial scales	2011
158	Pomadasys kaakan	ALC	Direct immersion	Age validation of nagroor, Pomadasys kaakan (Cuvier, 1830) (Family: Haemulidae) in Kuwaiti waters	2001
159	Pomoxis annularis	OTC; TC	Direct immersion	Year class contribution of white crappie fingerlings stocked in Lake Chicot, Arkansas; Validation of Daily Otolith Increments for Young-of-the-Year White Crappies	1991; 2001
160	Prochilodus lineatus	ARS	Direct immersion	A technique for detection of larval fish in the digestive tract of predators by otolith marking	2017
161	Pseudopleuronectes yokohamae	ALC	Direct immersion	Otolith microstructure and daily increment validation of marbled sole (Pseudopleuronectes yokohamae)	2005
162	Rhinogobius gigas	TC	Direct immersion	Upstream migration and marine early life history of amphidromous gobies inferred from otolith increments and microchemistry	2015
163	Rhombosolea tapirina	TC	Direct immersion	Daily growth increments in the otoliths of juvenile greenback flounder, Rhombosolea tapirina Gunther, 1862	1991
164	Rivulus marmoratus	ALC	Direct immersion	Age, Growth, and Sexual Development in the Self-fertilizing Hermaphroditic Fish Rivulus marmoratus	2000
165	Salmo salar	ARS; CAL; TCH	Direct immersion (for ARS; TCH); Feeding (for CAL); Osmotic induction (for CAL)	In vivo photostabilization of tetracycline hydrochloride by reduced glutathione for use as an ecological marker in Salmo salar; Improved Interpretation of Labelled Fish Otoliths: A Cost-Effective Tool in Sustainable Fisheries Management; Dietary Calcein Marking of Brook Trout, Atlantic Salmon, Yellow Perch, and Coho Salmon Scales;Producing Fluorescent Marks on Atlantic Salmon Fin Rays and Scales …	2002; 2003; 2005; 2006
166	Salmo trutta	ARS; TC	Direct immersion (for ARS); Osmotic induction (for TC)	New method for the marking of trout (Salmo trutta fario and Oncorhynchus mykiss ) eggs by osmotic incorporation of tetracycline at fertilization; Marking otoliths of brown trout (Salmo trutta L.) embryos with alizarin red S	1989; 2013
167	Salvelinus alpinus	ALC; ARS	Direct immersion	Relationship of otolith strontium-to-calcium ratios and salinity: experimental validation for juvenile salmonids; Improved Interpretation of Labelled Fish Otoliths: A Cost-Effective Tool in Sustainable Fisheries Management	2005; 2005
168	Salvelinus fontinalis	ARS; CAL; TC	Direct immersion (for ARS; TC); Feeding (for CAL; TC)	Dietary Calcein Marking of Brook Trout, Atlantic Salmon, Yellow Perch, and Coho Salmon Scales; Marking rainbow trout fry with tetracycline;Use of Tetracycline Drugs to Mark Advanced Fry and Fingerling Brook Trout (Salvelinus fontinalis); Relative Pectoral Fin Length Distinguishes Between Brook Trout and Landlocked Atlantic Salmon Fry	1964; 1973; 2005; 2006
169	Salvelinus namaycush	CAL; TC	Osmotic induction (for CAL); Injection (for TC)	Growth and Relative Size of Calcified Structures of Fish; Effect of Artificial Sunlight on the Retention of External Calcein Marks on Lake Trout	1990; 2008
170	Sander lucioperca	ARS	Direct immersion	Improved Interpretation of Labelled Fish Otoliths: A Cost-Effective Tool in Sustainable Fisheries Management	2005
171	Sander vitreus	ARS; CAL; OTC	Direct immersion (for ARS); Osmotic induction (for CAL and OTC)	Evaluation of Osmotic Induction of Calcein Treatments for Marking Juvenile Walleyes; Epural bones in teleost fishes: a problem of phylogenetic homology	2012; 2015
172	Scaphirhynchus platorynchus	CAL	Feeding；Direct immersion	Dietary Calcein Marking of Shovelnose Sturgeon and the Effect of Sunlight on Mark Retention	2011
173	Scarus frenatus	TC	Injection	Growth and longevity in fishes of the family Scaridae	1996
174	Scarus niger	TC	Injection	Growth and longevity in fishes of the family Scaridae	1996
175	Scarus rivulatus	TC	Injection	Growth and longevity in fishes of the family Scaridae	1996
176	Scarus schlegeli	TC	Injection	Validation of annual growth bands in the otolith of tropical parrotfishes (Scarus schlegeli Bleeker)	1992
177	Sciaenops ocellatus	ALC; CAL; OTC; TCH	Direct immersion	Calcein as a Fluorescent Marker of Otoliths of Larval and Juvenile Fish; An evaluation of six marking methods for age-0 red drum, Sciaenops ocellatus; Development of larval marking techniques and evaluation of stocking larvae to increase red drum population abundance	1987; 1995; 2006
178	Scomber japonicus	ALC	Direct immersion	Growth of juvenile chub mackerel Scomber japonicus in the western North Pacific Ocean: with application and validation of otolith daily increment formation	2014
179	Scophthalmus maximus	ALC; ARS	Direct immersion	Feasibility of otolith markings in large juvenile turbot, Scophthalmus maximus, using immersion in alizarin-red Ssolutions	2000
180	Sebastes inermis	TC	Direct immersion	Otolith microstructure of the black rockfish, Sebastes inermis	2001
181	Sebastes schlegelii	ARS; ALC; CAL; TCH	Direct immersion	Use of calcein and alizarin red S for immersion marking of black rockfish Sebastes schlegelii juveniles	2014
182	Sebastes thompsoni	TC	Direct immersion	Early life history traits of the gold-eye rockfish, Sebastes thompsoni, in relation to successful utilization of drifting seaweed	1998
183	Sebastiscus marmoratus	ALC	Direct immersion	Marking by alizarin complexone on scorpion fish Sebastiscus marmoratus fingerlings	1994
184	Seriola dumerili	OTC	Injection	Age distribution and growth of greater amberjack, Seriola dumerili, from the north-central Gulf of Mexico	1999
185	Sicyopus zosterophorum	ALC	Direct immersion	Pelagic larval duration of three amphidromous Sicydiinae gobies (Teleostei: Gobioidei) including widespread and endemic species	2012
186	Sinocyclocheilus grahami	ALC; ARS	Direct immersion	Use of alizarin red S and alizarin complexone for immersion marking Sinocyclocheilus grahami	2013
187	Smilosicyopus chloe	ALC	Direct immersion	Pelagic larval duration of three amphidromous Sicydiinae gobies (Teleostei: Gobioidei) including widespread and endemic species	2012
188	Sparus auratus	ARS	Direct immersion	Cellular morphology and markers of cartilage and bone in the marine teleost Sparus auratus	2011
189	Spratelloides robustus	OTC	Direct immersion	Blue sprat Spratelloides robustus (Clupeidae: Dussumieriinae): A temperate clupeoid with a tropical life history strategy?	2003
190	Squalus acanthias	TC	Injection	Age validation studies on the spines of the spurdog (Squalus acanthias ) using tetracycline	1985
191	Stephanolepis hispidus	ALC	Direct immersion	Otolith record of age, growth, and ontogeny in larval and pelagic juvenile Stephanolepis hispidus (Pisces: Monacanthidae)	2001
192	Stigmatopora argus	ALC; CAL	Direct immersion (for ALC); Osmotic induction (for CAL)	An osmotic induction method for externally marking saltwater fishes, Stigmatopora argus and Stigmatopora nigra, with calcein; Validation of otolith daily increment formation for two temperate syngnathid fishes: the pipefishes Stigmatopora argus and Stigmatopora nigra	2010; 2012
193	Stigmatopora nigra	ALC; CAL	Direct immersion (for ALC); Osmotic induction (for CAL)	An osmotic induction method for externally marking saltwater fishes, Stigmatopora argus and Stigmatopora nigra, with calcein; Validation of otolith daily increment formation for two temperate syngnathid fishes: the pipefishes Stigmatopora argus and Stigmatopora nigra	2010; 2012
194	Stizostedion vitreum	CAL; CAL-B; OTC	Direct immersion	Mass-marking otoliths of larval and juvenile walleyes by immersion in oxytetracycline, calcein, or calcein blue	1994
195	Subsequent examination	TC	Feeding	Marking Pacific salmon with tetracycline antibiotics	1967
196	Taeniura lymma	CAL	Injection	Growth of Tropical dasyatid Rays Estimated Using a Multi-Analytical Approach: e77197	2013
197	Takifugu rubripes	ALC; TC	Direct immersion	Otolith marking for eggs, larvae and juveniles of ocellate puffer Takifugu rubripes by alizarin complexone and tetracycline	2005
198	Theragra chalcogramma	ALC; ARS	Direct immersion	Daily and sub-daily otolith increments of larval and juvenile walleye pollock, Theragra chalcogramma (Pallas), as validated by alizarin complexone experiments; Walleye pollock Theragra chalcogramma during transformation from the larval to juvenile stage: Otolith and osteological development	2001; 2008
199	Thunnus albacares	OTC	Injection	Accounting for Age Uncertainty in Growth Modeling, the Case Study of Yellowfin Tuna (Thunnus albacares) of the Indian Ocean: e60886	2013
200	Thymallus thymallus	ARS	Direct immersion	Mass-marking of grayling, Thymallus thymallus (L.), larvae by fluorochrome tagging of otoliths	1995
201	Torpedo californica	CAL; OTC	Injection	Life history of the Pacific electric ray, Torpedo californica (Ayres), in central and southern California	1998
202	Trematomus newnesi	TC	Injection	Antarctic fish growth: Profile of Trematomus newnesi	1989
203	Trematomus nicolai	ARS	Direct immersion	Aspects of the Biology and Population Genetics of the Antarctic Nototheniid Fish Trematomus nicolai	2009
204	Triakis semifasciata	TC	Injection	Validated age and growth of the leopard shark, Triakis semifasciata , with comments on reproduction	1992
205	Tropheus moorii	TC	Injection	Validation of the periodicity of increment formation in the otoliths of a cichlid fish from Lake Tanganyika, East Africa	2004
206	Urobatis halleri	CAL	Injection	Elemental Markers in Elasmobranchs: Effects of Environmental History and Growth on Vertebral Chemistry: e62423	2013
207	Valenciennea muralis	CAL; TC; strontium chloride	Injection; Direct immersion	Validation of otolith growth-increment periodicity in tropical gobies	2000
208	Zebrasoma flavescens	TC	Direct immersion	Habitat- and sex-specific life history patterns of yellow tang Zebrasoma flavescens in Hawaii, USA	2009
